# Supplementary material for: Tumor Mesenchymal Stromal Cells Regulate Cell Migration of Atypical Teratoid Rhabdoid Tumor through Exosome-Mediated miR155/SMARCA4 Pathway
Source: PubMed Central journal article supplement (PMC6563126; doi:10.3390/cancers11050720), 2019-05-24
Supplement: cancers-11-00720-s001.pdf [file cancers-11-00720-s001.pdf]

## Supplemental Fig. 1

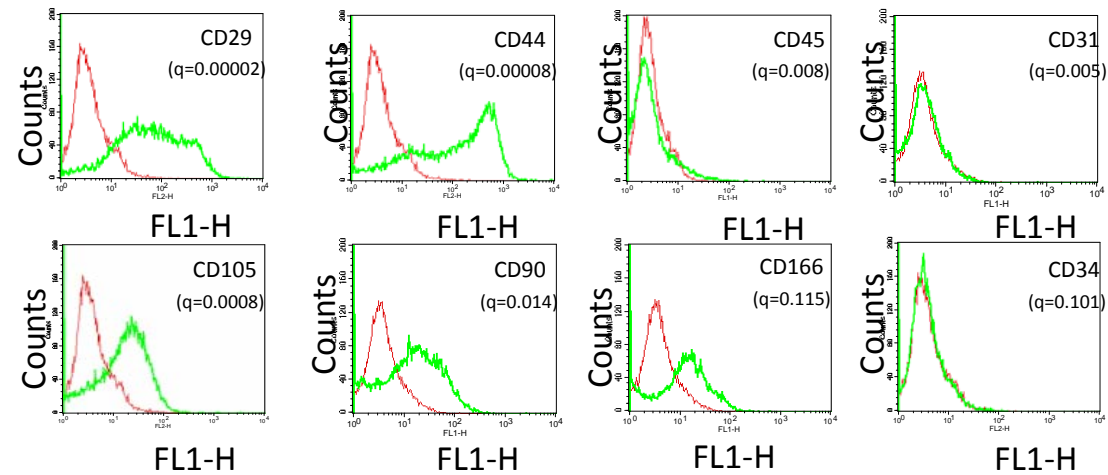

### Suppl. Fig. 1. Characterization of tMSC surface markers.

The isolated tMSCs were subjected to flow cytometry analysis to assess the expression of surface markers. The isolated tMSCs expressed the MSC-specific markers (CD29, CD44, CD90, CD105, and CD166), but not the endothelial and hematopoietic cell markers (CD31, CD34, and CD45).

Supplemental Fig. 2

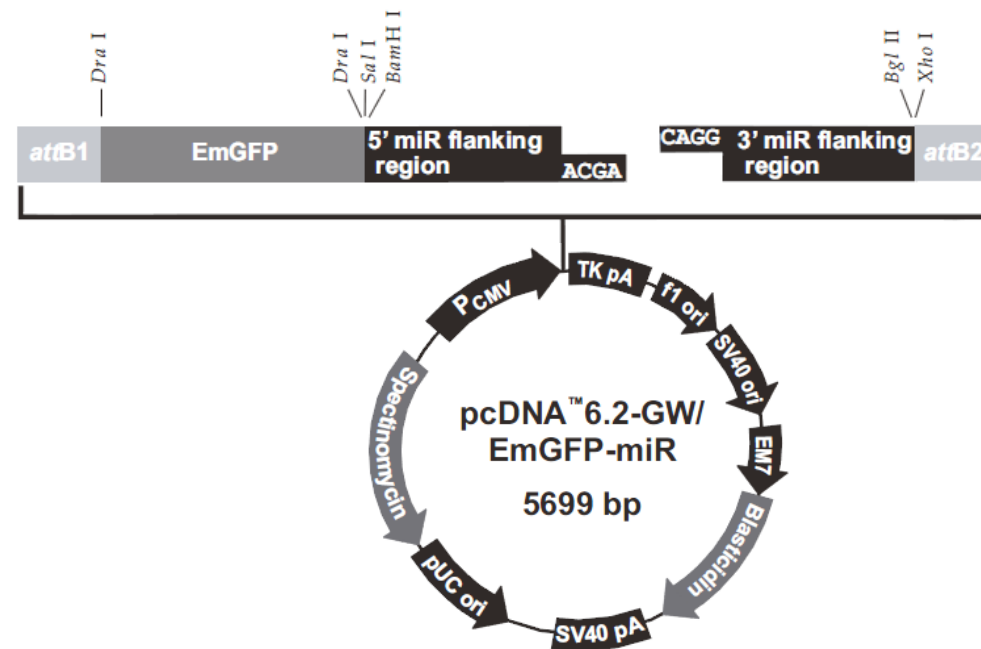

|                       |                                                                           |
|-----------------------|---------------------------------------------------------------------------|
| miR-Scramble-2XCtrl_T | TGCTG <b>TAACACGTCTATACGCCCA</b> AATT <b>TAACACGTCTATACGCCA</b> GTCC      |
| miR-155-B_2XSpG_T     | TGCTG <b>ACCCTATGGAATTAGCATTAA</b> AATT <b>ACCCTATGGAATTAGCATTAA</b> GTCC |

Suppl. Fig. 2. miR-155 sponge construction.

Supplemental Table 1. List of antibodies.

| Name    | Host species | Company        | Catalog NO. | Application |
|---------|--------------|----------------|-------------|-------------|
| FLAG    | Mouse mAb    | Sigma          | F3165       | WB          |
| SMARCA4 | Rabbit mAb   | Cell Signaling | #49360      | WB          |
| SNF5    | Mouse mAb    | Abcam          | ab58209     | WB          |
| SOCS1   | Rabbit mAb   | Cell Signaling | #3950       | WB          |
| GAPDH   | Rabbit mAb   | Cell Signaling | #5174       | WB          |

Supplemental Table 2. List of quantitative real-time PCR primers.

| Name            | Forward (5' to 3')       | Reverse (5' to 3')        | T <sub>m</sub> (°C) |
|-----------------|--------------------------|---------------------------|---------------------|
| hsa-miR-155-5p  | CGCAGTTAATGCTAATCGTGATAG | GGTCCAGTTTTTTTTTTTTTTAACC | 62.3                |
| hsa-miR-181c-5p | GAACATTCAACCTGTCGGT      | GGTCCAGTTTTTTTTTTTTTACTCA | 57.6                |
| hsa-miR-564     | CAGAGGCACGGTGTC          | AGTTTTTTTTTTTTTGCCTGCT    | 57.8                |
| SMARCA4         | TACAAGGACAGCAGCAGTGG     | TAGTACTCGGGCAGCTCCTT      | 60.0                |

Supplemental Table 3. List of shRNA target sequences

| Name      | Target sequence           | Target gene                           |
|-----------|---------------------------|---------------------------------------|
| shSMARCA4 | 5'-GTGCGACATGTCTGCGCTG-3' | Human SMARCA4 gene                    |
| shScr     | 5'-CAGTTACTAGACGCGATCG-3' | Scrambled shRNA sequence as a control |
